## CORRECTION

# Correction: Video game loot boxes are linked to problem gambling: Results of a large-scale survey

David Zendle, Paul Cairns

In the Conclusions section, there is an error in the last sentence of the first paragraph. It refers to the results of a parametric statistical test which appeared in the preprint, but was not used in the published manuscript. Therefore, the following sentence is not applicable: Indeed, subgroup analyses revealed that an individual's classification as either a non problem gambler or a problem gambler accounted for 37.7% of the variance in how much they spent on loot boxes.

## Reference

1. Zendle D, Cairns P (2018) Video game loot boxes are linked to problem gambling: Results of a large-scale survey. PLoS ONE 13(11): e0206767. <https://doi.org/10.1371/journal.pone.0206767> PMID: 30462669

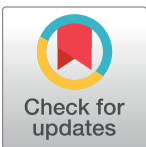

## OPEN ACCESS

**Citation:** Zendle D, Cairns P (2019) Correction: Video game loot boxes are linked to problem gambling: Results of a large-scale survey. PLoS ONE 14(3): e0214167. <https://doi.org/10.1371/journal.pone.0214167>

**Published:** March 14, 2019

**Copyright:** © 2019 Zendle, Cairns. This is an open access article distributed under the terms of the [Creative Commons Attribution License](https://creativecommons.org/licenses/by/4.0/), which permits unrestricted use, distribution, and reproduction in any medium, provided the original author and source are credited.
